# Supplementary material for: Customary physical activity and odds of depression: a systematic review and meta-analysis of 111 prospective cohort studies
Source: HighWire-hosted journal article supplement (doi:10.1136/bjsports-2020-103140), 2021-01-05
Supplement: bjsports-2020-103140supp001_data_supplement.pdf [file bjsports-2020-103140supp001_data_supplement.pdf]

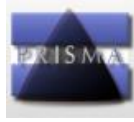

## PRISMA 2009 Flow Diagram

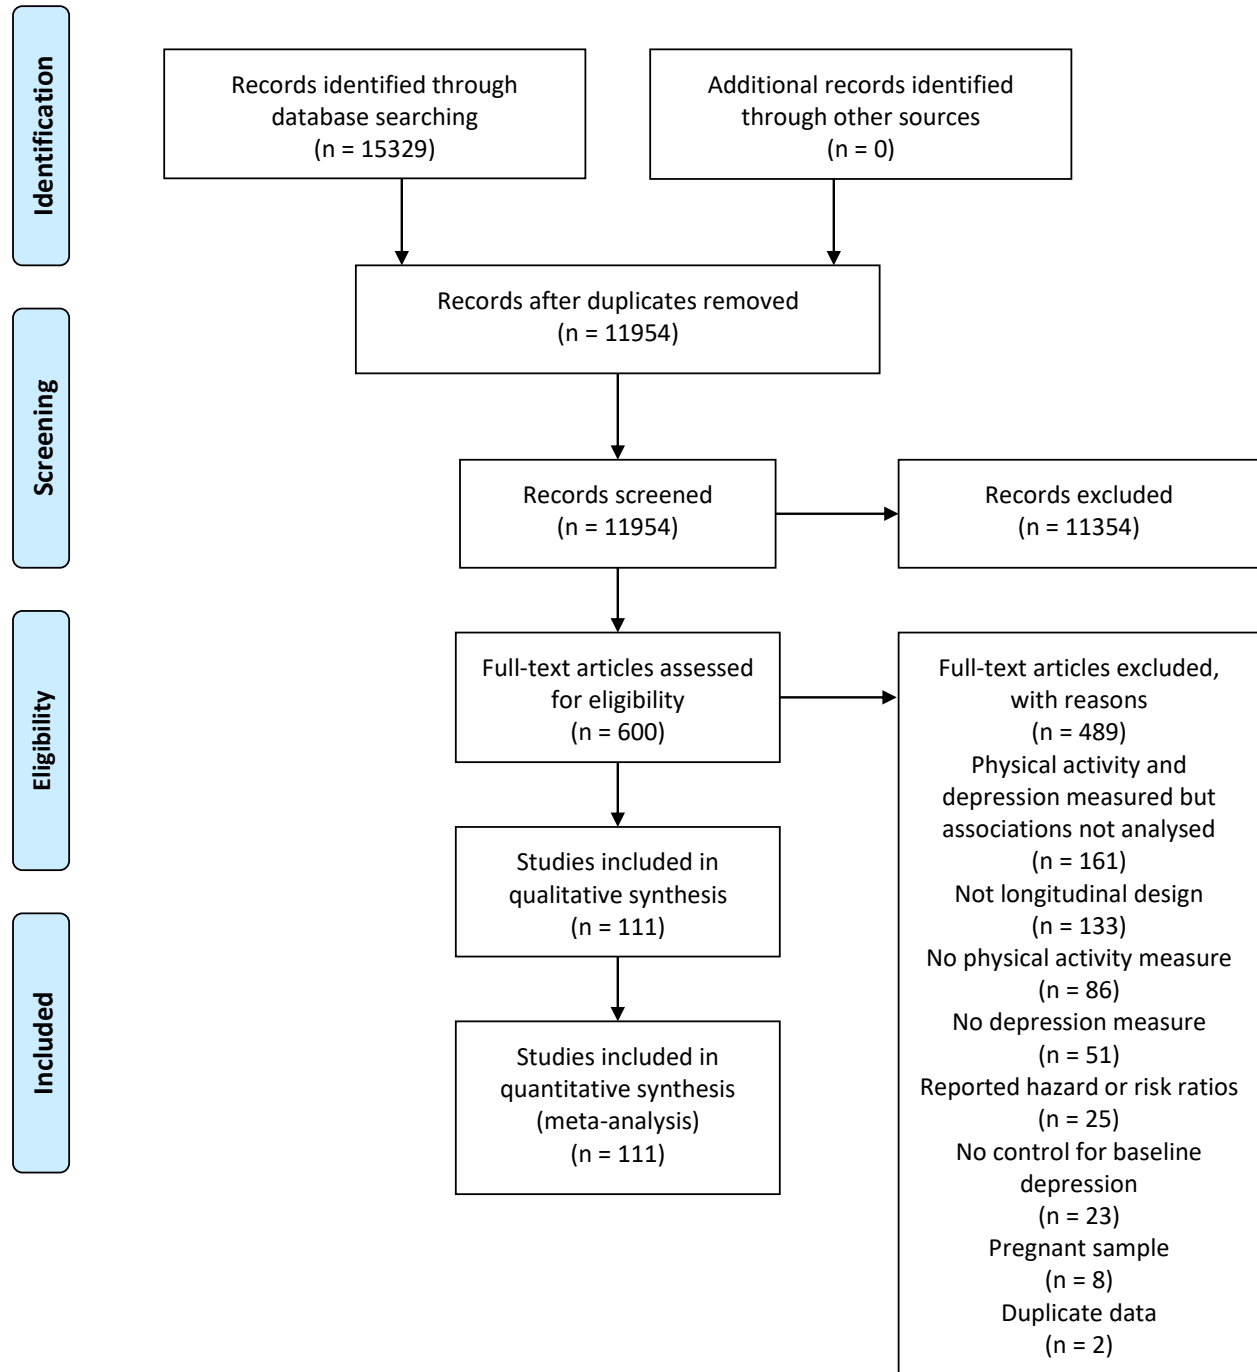

From: Moher D, Liberati A, Tetzlaff J, Altman DG, The PRISMA Group (2009). Preferred Reporting Items for Systematic Reviews and Meta-Analyses: The PRISMA Statement. PLoS Med 6(7): e1000097. doi:10.1371/journal.pmed1000097

For more information, visit [www.prisma-statement.org](http://www.prisma-statement.org).

From: Moher D, Liberati A, Tetzlaff J, Altman DG, The PRISMA Group (2009). *Preferred Reporting Items for Systematic Reviews and Meta-Analyses: The PRISMA Statement*. PLoS Med 6(7): e1000097. doi:10.1371/journal.pmed1000097

For more information, visit [www.prisma-statement.org](http://www.prisma-statement.org).
