# Supplementary material for: Customary physical activity and odds of depression: a systematic review and meta-analysis of 111 prospective cohort studies
Source: HighWire-hosted journal article supplement (doi:10.1136/bjsports-2020-103140), 2021-01-05
Supplement: bjsports-2020-103140supp003_data_supplement.pdf [file bjsports-2020-103140supp003_data_supplement.pdf]

Supplementary Table 2. Summary of Studies Included in the Meta-Analysis

| Author                        | Country                     | Number of Odds Ratios (Crude/ Adjusted) | Study Design                           | Sample Size (% female) | Participants                                          | Age (years) | Follow-up (years) | PA Measure                                               | PA Parameters    | Depression Measure                                   | Depression Method  |
|-------------------------------|-----------------------------|-----------------------------------------|----------------------------------------|------------------------|-------------------------------------------------------|-------------|-------------------|----------------------------------------------------------|------------------|------------------------------------------------------|--------------------|
| Abjibade et al, (2018)        | France                      | 1/0                                     | Baseline exposure                      | 25837 (76.1)           | Participants from NutriNet-Santé study                | 47.3        | 5.40              | IPAQ                                                     | Volume           | CES-D ≥ 17 (men) and ≥ 23 (women)                    | Screening level    |
| Amara et al, (2019)           | USA                         | 0/1                                     | Change in outcome                      | 380 (34.5)             | Participants from the PPMI study                      | 63.55       | 2.00              | PASE                                                     | Volume           | GDS-15 (continuous)                                  | Symptoms           |
| Anagnostopoulos et al, (2015) | Switzerland                 | 2/0                                     | Baseline exposure                      | 6756 (27.3)            | Participants from Swiss HIV Cohort Study              | NR          | 3.00              | Single question on frequency of exercise                 | Frequency        | Psychiatrist diagnosis                               | Clinical diagnosis |
| Andrade-Gomez et al, (2018)   | Spain                       | 0/4                                     | Change in outcome                      | 1461 (51.1)            | Participants from the Seniors-ENRICA cohort           | 70.77       | 3.00              | Validated questionnaire                                  | MET.hours        | GDS-10 (continuous)                                  | Symptoms           |
| Augestad et al, (2008)        | Norway                      | 0/6                                     | Baseline exposure                      | 6661 (50.3)            | Participants from HUNT Cohort Study                   | 21-40       | 11.00             | Questions on frequency, duration, and intensity of PA    | Volume           | HADS-D ≥ 8                                           | Screening level    |
| Backmand et al, (2009)        | Finland                     | 4/0                                     | Baseline exposure                      | 853 (0)                | Former elite male athletes and military               | 52.6        | 10.00             | Three questions on PA intensity, duration, and frequency | MET.hours        | Highest 10% of scores in short stress symptom survey | Screening level    |
| Ball et al, (2009)            | Australia                   | 4/4                                     | Baseline exposure<br>Change in outcome | 6677 (100)             | Participants from ALSWH                               | 22-27       | 3.00              | Questions on PA frequency and duration                   | MET.minutes      | CES-D ≥ 10                                           | Screening level    |
| Baumeister et al, (2017)      | Germany                     | 0/2                                     | Baseline exposure                      | 1,043 (49.7)           | Participants from SHIP Study                          | 20-79       | 4.50              | Baecke questionnaire                                     | Volume           | BDI-II ≥ 12                                          | Screening level    |
| Beard et al, (2007)           | Australia                   | 3/0                                     | Baseline exposure                      | 1407 (56.0)            | Participants from Northern Rivers Mental Health Study | 18+         | 2.00              | Questions on PA type, frequency, and duration            | Time             | MiniCIDI (DSM-IV based interview)                    | Clinical diagnosis |
| Bernaards et al, (2006)       | Netherlands                 | 0/6                                     | Change in exposure                     | 1747 (57.2)            | Participants from SMASH                               | 36.0        | 3.00              | One question on PA frequency                             | Frequency        | CES-D-11 ≥ 6                                         | Screening level    |
| Bots et al, (2007)            | Finland, Italy, Netherlands | 1/1                                     | Baseline exposure<br>Change in outcome | 526 (0)                | Participants from FINE Study                          | 75.0        | 5.00              | Morris questionnaire                                     | Frequency & time | ZSDS ≥ 48                                            | Screening level    |
| Boyes et al, (2013)           | Australia                   | 0/1                                     | Change in outcome                      | 1154 (41.6)            | Cancer patients                                       | 18-80       | 0.50              | Three questions on PA frequency and                      | Volume           | HADS-D ≥ 8                                           | Screening level    |

| duration                  |                                  |     |                                                      |             |                                                    |       |       |                                                       |           |                                                           |                 |
|---------------------------|----------------------------------|-----|------------------------------------------------------|-------------|----------------------------------------------------|-------|-------|-------------------------------------------------------|-----------|-----------------------------------------------------------|-----------------|
| Branstrom et al, (2015)   | Sweden                           | 0/1 | Change in exposure and outcome                       | 726 (100)   | Breast cancer patients                             | 51.3  | 2.00  | Single question on PA frequency                       | Frequency | HADS-D ≥ 8                                                | Screening level |
| Brown et al, (1996)       | US                               | 1/0 | Baseline exposure                                    | 1322 (55.0) | Participants from NHANES                           | 20-79 | 8.00  | Two questions on recreational and non-recreational PA | Time      | CES-D ≥ 16                                                | Screening level |
| Brown et al, (2005)       | Australia                        | 0/2 | Change in exposure and outcome                       | 8855 (100)  | Participants from ALSWH                            | 47.5  | 4.00  | Questions on PA frequency and duration                | Volume    | CES-D-10 ≥ 10                                             | Screening level |
| Brunet et al, (2018)      | Canada                           | 2/0 | Change in exposure<br>Change in exposure and outcome | 201 (100)   | Women post-breast cancer treatment in Montreal     | 55.0  | 1.50  | Actigraph GT3X accelerometer                          | Volume    | CES-D-10 (continuous)                                     | Symptoms        |
| Byers et al, (2012)       | US                               | 0/1 | Baseline exposure                                    | 7240 (100)  | Participants from Study of Osteoporotic Fractures  | 72.8  | 12.20 | Modified Paffenbarger Activity Questionnaire          | Volume    | GDS (continuous)                                          | Symptoms        |
| Cabello et al, (2017)     | Ghana, India, Mexico, and Russia | 1/0 | Baseline exposure                                    | 5970 (66.5) | Participants from World Health Organization’s SAGE | 50.2  | 5.00  | IPAQ short form                                       | MET.hours | SR of clinical diagnosis, treatment, or ICD-10 depression | SR diagnosis    |
| Camacho et al, (1991)     | US                               | 0/2 | Change in exposure<br>Change in exposure and outcome | 4848 (55.6) | Participants from Alameda County Study             | 50.0  | 9.00  | Question on PA type and frequency                     | Frequency | Alameda County Study scale ≥ 5                            | Screening level |
| Capella McDonnall, (2011) | US                               | 1/0 | Change in exposure and outcome                       | 2688 (54.1) | Elderly people with dual sensory loss              | 69.2  | 13.00 | One question on PA frequency                          | Frequency | CES-D-8 (continuous)                                      | Symptoms        |
| Carroll et al, (2010)     | USA                              | 0/2 | Change in exposure and outcome                       | 5389 (57.2) | Participants from Health and Retirement Study      | 55.5  | 6.00  | Single question on PA frequency                       | Frequency | Male: CES-D ≥ 4<br>Female: CES-D ≥ 3                      | Screening level |
| Chang et al, (2015)       | Iceland                          | 0/1 | Baseline exposure                                    | 4140 (57.0) | Participants from Reykjavik Study                  | 52.0  | 25.00 | Two questions on PA frequency and duration            | Time      | GDS-15 ≥ 6                                                | Screening level |

|                              |        |     |                                |             |                                                                                               |       |       |                                                          |                                            |                           |                 |
|------------------------------|--------|-----|--------------------------------|-------------|-----------------------------------------------------------------------------------------------|-------|-------|----------------------------------------------------------|--------------------------------------------|---------------------------|-----------------|
| Chang et al, (2017)          | Taiwan | 0/4 | Change in outcome              | 2673 (45.5) | Participants from TLSA                                                                        | 74.2  | 8.00  | Questions on frequency, duration, and intensity of PA    | Frequency                                  | CESD ≥ 10                 | Screening level |
| Chao, (2014)                 | Taiwan | 0/2 | Change in exposure and outcome | 2660 (43.9) | Participants from SHLSE                                                                       | 80.8  | 3.00  | One question on frequency of PA                          | Frequency                                  | CES-D (continuous)        | Symptoms        |
| Chen & Millar, (1999)        | Canada | 1/1 | Baseline exposure              | 7593 (53.8) | Participants from National Population Health Survey                                           | 38.0  | 2.00  | Questions on PA type, frequency, and duration            | Kilocalories/ kilogram of body weight/ day | DSM III-R CIDI            | Diagnosis       |
| Chi et al, (2016)            | Taiwan | 0/2 | Baseline exposure              | 2630 (46.8) | Participants from TLSA                                                                        | 53+   | 4.00  | Questions on frequency, duration, and intensity of PA    | Volume                                     | CES-D ≥ 10                | Screening level |
| Choi et al, (2015)           | Korea  | 1/1 | Baseline exposure              | 5327 (52.6) | Participants from KLoSA                                                                       | 45+   | 2.00  | Questions on exercise frequency and duration             | Time                                       | CES-D-10 ≥ 4              | Screening level |
| Choi et al, (2020)           | UK     | 0/1 | Baseline exposure              | 7968 (57.0) | Participants from UK Biobank                                                                  | 60.0  | 2.00  | Series of questions on time engaged in eight types of PA | MET.hours                                  | ICD-9 or 10 diagnosis     | Diagnosis       |
| Chuang et al, (2012)         | USA    | 0/1 | Change in outcome              | 1404 (100)  | Participants from CePAWHS                                                                     | 18-45 | 2.00  | Single question: MVPA ≥ 30 min most days of week         | Volume                                     | Modified CES-D ≥ 4        | Screening level |
| Cooper-Patrick et al, (1997) | USA    | 2/2 | Baseline exposure              | 752 (8.0)   | Participants from Precursors Study                                                            | 50.0  | 15.00 | Harvard Alumni PA questionnaire                          | Frequency                                  | SR of clinical depression | SR diagnosis    |
| Da Silva et al., (2012)      | UK     | 1/1 | Baseline exposure              | 9309 (31.5) | Participants from Whitehall II Study                                                          | 35-55 | 3.00  | Two questions on PA duration and intensity               | Volume                                     | 30-item GHQ ≥ 4           | Screening level |
| Dugan et al, (2015)          | USA    | 0/2 | Change in outcome              | 2682 (100)  | Participants from SWAN Study                                                                  | 45.9  | 10.00 | Kaiser PA Survey                                         | Volume                                     | CES-D ≥ 16                | Screening level |
| Edwards et al, (2016)        | USA    | 0/1 | Baseline exposure              | 489 (82.2)  | People with multiple sclerosis, spinal cord injury, muscular dystrophy, or postpolio syndrome | 54.3  | 3.50  | GLTEQ                                                    | Volume                                     | PHQ-9 ≥ 10                | Screening level |
| Ensari et al, (2014)         | USA    | 0/1 | Change in outcome              | 269 (82.9)  | People with multiple sclerosis                                                                | 45.9  | 2.50  | GLTEQ                                                    | Volume                                     | HADS-D ≥ 8                | Screening level |
| Ernstsen et al, (2016)       | Norway | 0/2 | Change in exposure             | 189 (24.3)  | Participants from HUNT Cohort Study                                                           | 61.6  | 22.00 | Questions on exercise frequency, intensity, and duration | Volume                                     | HADS-D ≥ 8                | Screening level |

|                                 |             |     |                                |                |                                                           |       |       |                                                                                |             |                                              |                 |
|---------------------------------|-------------|-----|--------------------------------|----------------|-----------------------------------------------------------|-------|-------|--------------------------------------------------------------------------------|-------------|----------------------------------------------|-----------------|
| España-Romero et al, (2013)     | USA         | 0/2 | Baseline exposure              | 5110 (20.4)    | Participants from Aerobic Center Longitudinal Study       | 47.5  | 6.10  | Questions on PA frequency, intensity, and duration                             | MET.minutes | CES-D-10 ≥ 8                                 | Screening level |
| Farmer et al, (1988)            | USA         | 0/2 | Baseline exposure              | 1163 (51.5)    | Participants from NHANES                                  | 50.0  | 9.00  | Questions on recreational and nonrecreational PA                               | Frequency   | CES-D ≥ 16                                   | Screening level |
| Ford et al, (1998)              | USA         | 1/0 | Change in exposure and outcome | 1190 (0)       | Participants from Precursors Study                        | 66.0  | 37.00 | Harvard Alumni PA questionnaire                                                | Frequency   | SR of clinical depression                    | SR diagnosis    |
| Foreyt et al, (1995)            | USA         | 2/0 | Change in exposure and outcome | 381 (48.9)     | Participants from Reno diet-heart study                   | 44.1  | 4.00  | Composite measure of SR recreational PA and PA importance                      | Frequency   | CES-D (continuous)                           | Symptoms        |
| Fukukawa, (2004)                | Japan       | 0/1 | Change in outcome              | 314 (41.7)     | Participants from NILSLSA                                 | 65-79 | 2.00  | Pedometer                                                                      | Distance    | CES-D (continuous)                           | Symptoms        |
| Gallegos-Carrillo et al, (2013) | Mexico      | 2/2 | Change in exposure             | 1047 (77.5)    | Participants from Health Worker Cohort Study              | 18+   | 6.00  | Questionnaire on PA duration and intensities                                   | MET.hours   | CES-D ≥ 16                                   | Screening level |
| Garcia-Pena et al, (2013)       | Mexico      | 0/1 | Change in outcome              | 7882 (61.2)    | Participants from Integrated Study of the Elderly         | 71.0  | 2.00  | One question assessing exercise frequency                                      | Frequency   | GDS-30 ≥ 11                                  | Screening level |
| Giltay et al, (2006)            | Netherlands | 1/0 | Baseline exposure              | 464 (0)        | Participants from Zutphen Elderly Study                   | 70.8  | 15.00 | Zutphen PA Questionnaire                                                       | Volume      | ZSDS ≥ 50                                    | Screening level |
| Gudmundsson et al, (2015)       | Sweden      | 1/1 | Change in outcome              | 676 (100)      | Participants from PPSW                                    | 53.4  | 32.00 | Saltin–Grimby PA Level Scale                                                   | Volume      | MADRS (continuous)                           | Symptoms        |
| Hallgren et al, (2019)          | Sweden      | 2/0 | Baseline exposure              | 25520 (64.8)   | Participants from the Swedish National March Cohort study | 18+   | 13.00 | Nine questions on time engaged in physical activities of different intensities | Volume      | MDD diagnosis made by a specialist clinician | Diagnosis       |
| Hamer et al, (2009)             | England     | 0/2 | Change in outcome              | 4323 (52.5)    | Participants from ELSA                                    | 63.4  | 4.00  | Questions on frequency of moderate and vigorous PA                             | Frequency   | CES-D-8 ≥ 4                                  | Screening level |
| Han et al, (2019)               | South Korea | 8/0 | Baseline exposure              | 2502998 (60.7) | Adults in South Korea                                     | 20+   | 1.00  | Reported days per week engaged in specific doses of PA                         | Frequency   | Korean Classification of Diseases diagnosis  | Diagnosis       |
| Harvey et al, (2017)            | Norway      | 0/1 | Baseline exposure              | 33908 (49.5)   | Participants from HUNT Cohort Study                       | 45.2  | 11.00 | Questions on frequency, duration, and                                          | Time        | HADS ≥ 8                                     | Screening level |

| intensity of exercise       |             |     |                                                     |             |                                                            |      |       |                                                    |             |                     |                 |
|-----------------------------|-------------|-----|-----------------------------------------------------|-------------|------------------------------------------------------------|------|-------|----------------------------------------------------|-------------|---------------------|-----------------|
| Henchoz et al, (2014)       | Switzerland | 4/0 | Baseline exposure<br>Change in exposure and outcome | 4846 (0)    | Participants from C-SURF                                   | 20.0 | 1.42  | One question on exercise frequency                 | Frequency   | MDI (continuous)    | Symptoms        |
| Herbolsheimer et al, (2018) | Germany     | 0/1 | Change in outcome                                   | 334 (39.2)  | Participants from the from the ActiFE Ulm study            | 72.6 | 3.00  | activPAL accelerometer                             | Time        | HADS-D (continuous) | Symptoms        |
| Hiles et al, (2015)         | Australia   | 0/2 | Baseline exposure                                   | 1410 (50.4) | Participants from Hunter Community Study                   | 65.6 | 4.50  | Pedometer                                          | Distance    | CES-D ≥ 16          | Screening level |
| Hiles et al, (2017)         | Australia   | 0/1 | Change in outcome                                   | 2932 (66.4) | Participants from NESDA                                    | 41.9 | 2.00  | IPAQ short form                                    | MET.minutes | IDS (continuous)    | Symptoms        |
| Hurwitz, (2003)             | USA         | 0/1 | Baseline exposure                                   | 2902 (53.0) | Participants from CWSH                                     | 18+  | 1.00  | Question on PA frequency                           | Frequency   | GDS-short form ≥ 7  | Screening level |
| Ivanova et al, (2016)       | Canada      | 2/2 | Change in outcome                                   | 1691 (49.1) | Participants from Evaluation of Diabetes Treatment study   | 63.9 | 1.00  | One question on exercise frequency                 | Frequency   | PHQ-9 (continuous)  | Symptoms        |
| Jantunen et al, (2019)      | Finland     | 0/2 | Change in exposure and outcome                      | 890 (57.2)  | Participants from the Helsinki Birth Cohort Study          | 61.3 | 10.00 | Validated questionnaire                            | MET.hours   | BDI (continuous)    | Symptoms        |
| Joshi et al, (2016)         | USA         | 0/3 | Change in outcome                                   | 2023 (60.8) | Participants from NYC NAMES                                | 70.2 | 1.00  | PASE                                               | Volume      | PHQ-9 ≥ 10          | Screening level |
| Kanamori et al, (2018)      | Japan       | 2/2 | Baseline exposure                                   | 1422 (45.9) | Participants from JAGES                                    | 72.5 | 2.00  | Two questions on exercise frequency                | Frequency   | GDS-15 ≥ 5          | Screening level |
| Kaseva et al, (2016)        | Finland     | 0/1 | Change in outcome                                   | 1724 (50.9) | Participants from Cardiovascular Risk in Young Finns Study | 41.4 | 5.00  | Questions on PA frequency, intensity, and duration | Frequency   | BDI-II (continuous) | Symptoms        |
| Khalaila & Litwin (2014)    | Israel      | 0/2 | Change in exposure and outcome                      | 1524 (57.0) | Participants from Israeli component of SHARE               | 50+  | 4.00  | Two questions on moderate and vigorous PA          | Frequency   | EURO-D ≥ 4          | Screening level |
| Khalaila, (2016)            | Israel      | 1/1 | Baseline exposure                                   | 1038 (58.2) | Participants from Israeli component of SHARE               | 50+  | 10.00 | Two questions on moderate and vigorous PA          | Frequency   | EURO-D ≥ 4          | Screening level |
| Knox et al, (2006)          | USA         | 2/2 | Change in exposure                                  | 5115 (54.4) | Participants from CARDIA                                   | 35.5 | 15.00 | Interview administered questions on PA             | METs        | CES-D ≥ 16          | Screening level |

| type, frequency, and duration   |           |     |                                                     |              |                                                                                        |       |       |                                                          |             |                                                          |                 |
|---------------------------------|-----------|-----|-----------------------------------------------------|--------------|----------------------------------------------------------------------------------------|-------|-------|----------------------------------------------------------|-------------|----------------------------------------------------------|-----------------|
| Kritz-Silverstein et al, (2001) | USA       | 0/4 | Baseline exposure                                   | 944 (57.2)   | Participants from Rancho Bernardo Heart and Chronic Disease Study.                     | 70.4  | 8.00  | Two questions on strenuous exercise and labour frequency | Frequency   | Modified BDI ≥ 13                                        | Screening level |
| Ku at al, (2009)                | Taiwan    | 2/2 | Baseline exposure<br>Change in exposure             | 2831 (45.0)  | Participants from Longitudinal Survey of Health & Living status of the Elderly, Taiwan | 50+   | 7.00  | One question on PA frequency                             | Frequency   | CES-D-10 ≥ 10                                            | Screening level |
| Ku at al, (2012)                | Taiwan    | 2/2 | Change in outcome<br>Change in exposure and outcome | 1160 (49.4)  | Participants from Longitudinal Survey of Health & Living status of the Elderly, Taiwan | 67+   | 11.00 | One question on PA frequency                             | Frequency   | CES-D-10 (continuous)                                    | Symptoms        |
| Lampinen et al, (2000)          | Finland   | 0/1 | Change in exposure and outcome                      | 663 (64.0)   | Participants from Evergreen project                                                    | 75.0  | 8.00  | Question on physical exercise type                       | Frequency   | Modified BDI-13 ≥ 5                                      | Screening level |
| Lee et al, (2017)               | Australia | 1/0 | Change in outcome                                   | 218 (58.0)   | Post-hospitalized older adults                                                         | 65+   | 0.50  | Phone-FITT household and recreational subscales          | Time        | GDS-short form ≥ 6                                       | Symptoms        |
| Lindwall et al, (2011)          | Europe    | 1/0 | Baseline exposure                                   | 17593 (54.6) | Participants from SHARE                                                                | 64.1  | 2.00  | Two questions on PA frequency and intensity              | Frequency   | Affective suffering factor of EURO-D (continuous)        | Symptoms        |
| Lindwall et al, (2014)          | Sweden    | 1/0 | Change in exposure and outcome                      | 3717 (86.0)  | Swedish health care workers                                                            | 46.9  | 6.00  | Saltin–Grimby PA Level Scale                             | Volume      | HADS-D (continuous)                                      | Symptoms        |
| Lucas et al, (2011)             | USA       | 4/0 | Baseline exposure                                   | 49821 (100)  | Participants from Nurses’ Health Study                                                 | 63.0  | 2.00  | SR average time spent in various activities per week     | Volume      | SR physician diagnosis or regular use of antidepressants | SR diagnosis    |
| McDowell et al, (2018)          | Ireland   | 3/3 | Baseline exposure                                   | 4146 (44.6)  | Participants from TILDA                                                                | 50+   | 2.00  | IPAQ short form                                          | MET.hours   | CES-D ≥ 16                                               | Screening level |
| Messier et al, (2013)           | Canada    | 1/2 | Baseline exposure<br>Change in exposure             | 1183 (53.6)  | Participants from Montreal Diabetes Health and Well-Being Study                        | 18-80 | 1.00  | One question on PA frequency                             | Frequency   | PHQ-9 ≥ 5                                                | Screening level |
| Mihrshahi et al, (2014)         | Australia | 3/3 | Baseline                                            | 5117         | Participants from                                                                      | 55.5  | 3.00  | Questions on PA                                          | MET,minutes | CES-D-10 ≥ 10                                            | Screening       |

|                             |         |     | exposure                                            | (100)        | ALSWH                                                      |        |       | frequency and duration                                        |                    |                                         | level           |
|-----------------------------|---------|-----|-----------------------------------------------------|--------------|------------------------------------------------------------|--------|-------|---------------------------------------------------------------|--------------------|-----------------------------------------|-----------------|
| Mobily et al, (1996)        | USA     | 0/2 | Baseline exposure                                   | 2084 (63.2)  | Participants from Rural Health Study                       | 73.2   | 3.50  | One question on walking frequency                             | Frequency          | CES-D ≥ 16                              | Screening level |
| Monin et al, (2015)         | USA     | 0/2 | Change in exposure and outcome                      | 2520 (50.0)  | Participants from Cardiovascular Health Study              | 72.4   | 7.00  | Questions on PA type, frequency, and duration                 | Kilocalories/ week | Modified CES-D (continuous)             | Symptoms        |
| Morgan & Bath, (1998)       | UK      | 0/1 | Change in outcome                                   | 690 (57.2)   | Participants from NLSAA                                    | 75.6   | 4.00  | Questions on PA frequency and duration                        | Time               | SAD ≥ 6 & SAD-D ≥ 4                     | Screening level |
| Motl et al, (2012)          | USA     | 1/1 | Change in outcome                                   | 218 (93.7)   | People with multiple sclerosis                             | 43.5   | 1.50  | IPAQ short form                                               | METs               | HADS-D (continuous)                     | Symptoms        |
| Oh et al, (2020)            | Korea   | 2/2 | Baseline exposure                                   | 3873 (57.3)  | Participants from KLOSCAD                                  | 70.4   | 4.00  | ?                                                             | MET.minutes        | MINI-K diagnosis                        | Diagnosis       |
| Ohrnberger et al, (2017)    | UK      | 0/1 | Change in outcome                                   | 10693 (55.0) | Participants from ELSA                                     | 66.3   | 2.00  | Questions on frequency of moderate and vigorous PA            | Frequency          | CES-D (continuous)                      | Symptoms        |
| Paffenbarger et al, (1994)  | USA     | 0/2 | Baseline exposure                                   | 10201 (0)    | Harvard Alumni                                             | 54.5   | 25.00 | Questions on PA types, frequencies, and durations             | Volume             | SR of physician diagnosis of depression | SR diagnosis    |
| Park et al., (2015)         | Korea   | 0/2 | Baseline exposure                                   | 701 (59.9)   | Participants from YEDD Study                               | 72.2   | 5.00  | Modified IPAQ                                                 | MET.hours          | GDS ≥ 8                                 | Screening level |
| Perrino et al, (2010)       | USA     | 0/2 | Baseline exposure<br>Change in exposure and outcome | 273 (59.0)   | Participants from Hispanic Elders’ Behavioral Health Study | 70-100 | 1.00  | SR walking routes during the preceding week                   | Distance           | CES-D (continuous)                      | Symptoms        |
| Pinto Pereira et al, (2014) | UK      | 0/3 | Change in exposure and outcome                      | 11135 (56.0) | Participants from 1958 British Birth Cohort                | 23.0   | 27.00 | One question on PA frequency                                  | Frequency          | Malaise Inventory (top 10%)             | Screening level |
| Poole & Jackowska (2018)    | UK      | 0/1 | Change in exposure                                  | 5172 (54.6)  | Participants from ELSA                                     | 50+    | 4.00  | Questions on frequency of moderate and vigorous PA            | Frequency          | CES-D (continuous)                      | Symptoms        |
| Quezada et al, (2017)       | Mexico  | 0/1 | Change in outcome                                   | 456 (100)    | Adult women of Health Workers Cohort                       | 45.8   | 5.00  | SR time per week spent in various activities within past year | MET.hours          | CES-D (continuous)                      | Symptoms        |
| Raudsepp & Riso (2017)      | Estonia | 0/2 | Change in exposure                                  | 195 (56.4)   | Community-dwelling older                                   | 72.1   | 1.00  | Yamax-Digiwalker pedometer                                    | Distance           | GDS-15 (continuous)                     | Symptoms        |

|                                    |             |     | and<br>outcome                          |                 | adults                                                            |       |       |                                                                   |           |                                                     |                       |
|------------------------------------|-------------|-----|-----------------------------------------|-----------------|-------------------------------------------------------------------|-------|-------|-------------------------------------------------------------------|-----------|-----------------------------------------------------|-----------------------|
| Ribeiro et al, (2017)              | USA         | 1/1 | Change in<br>outcome                    | 550<br>(65.0)   | Participants from<br>African American<br>Health Study             | 64.1  | 2.00  | Yale Physical<br>Activity Survey                                  | Volume    | CES-D-11 ≥ 9                                        | Screening<br>level    |
| Rius-Ottenheim et al,<br>(2013)    | Netherlands | 1/1 | Change in<br>exposure<br>and<br>outcome | 600<br>(19.0)   | Participants from<br>Alpha Omega Trial                            | 68.5  | 3.33  | PASE                                                              | Volume    | GDS-15<br>(continuous)                              | Symptoms              |
| Roh et al, (2015)                  | Korea       | 0/1 | Change in<br>outcome                    | 6647<br>(55.5)  | Participants from<br>Living Profiles of<br>Older People<br>Survey | 69.8  | 3.00  | Two questions on<br>PA frequency and<br>duration                  | Time      | GDS-15 ≥ 8                                          | Screening<br>level    |
| Rubin et al, (2005)                | USA         | 1/0 | Change in<br>exposure<br>and<br>outcome | 1550<br>(68.0)  | Participants from<br>Diabetes Prevention<br>Program               | 25+   | 3.20  | Modifiable<br>Activity<br>Questionnaire                           | MET.hours | BDI ≥ 11                                            | Screening<br>level    |
| Ruiz-Estigarribia et al,<br>(2019) | Spain       | 0/1 | Baseline<br>exposure                    | 14908<br>(59.5) | Participants from<br>the SUN project                              | 36.7  | 18.00 | Questions on PA<br>duration                                       | MET.hours | SR doctor<br>diagnosis or use<br>of antidepressants | SR<br>diagnosis       |
| Sanchez-Villegas et al,<br>(2008)  | Spain       | 0/1 | Baseline<br>exposure                    | 10381<br>(54.0) | Participants from<br>SUN cohort study                             | 42.1  | 6.00  | Questions on PA<br>duration                                       | MET.hours | SR of physician<br>diagnosis of<br>depression       | SR<br>diagnosis       |
| Sin et al, (2016)                  | USA         | 1/1 | Change in<br>outcome                    | 667<br>(17.7)   | Participants from<br>Heart and Soul<br>Study                      | 66.1  | 5.00  | PA over past<br>month scored on 5-<br>point scale                 | Frequency | PHQ-9<br>(continuous)                               | Symptoms              |
| Smith et al, (2010)                | Spain       | 2/2 | Baseline<br>exposure                    | 3196<br>(0)     | Participants from<br>Honolulu-Asia<br>Aging Study                 | 71-93 | 8.00  | One question on<br>distance walked<br>daily                       | Distance  | CES-D ≥ 9                                           | Screening<br>level    |
| Stewart et al, (1994)              | USA         | 0/3 | Change in<br>exposure<br>and<br>outcome | 736<br>(59.4)   | Participants from<br>Medical Outcomes<br>Study                    | 56.1  | 2.00  | Questions on PA<br>type, frequency,<br>duration, and<br>intensity | Time      | MOSFWBP-C<br>(continuous)                           | Symptoms              |
| Strawbridge et al, (2002)          | USA         | 2/1 | Baseline<br>exposure                    | 1947<br>(56.0)  | Participants from<br>Alameda County<br>Study                      | 63.0  | 5.00  | Questions on PA<br>type and frequency                             | Frequency | DSM diagnosis                                       | Clinical<br>diagnosis |
| ten Have et al, (2011)             | Netherlands | 0/2 | Baseline<br>exposure                    | 4796<br>(49.4)  | Participants from<br>NEMESIS                                      | 18-64 | 3.00  | One question on<br>exercise duration                              | Time      | CIDI<br>computerized<br>version 1.1                 | Clinical<br>diagnosis |
| Tsai et al, (2013)                 | Taiwan      | 0/2 | Baseline<br>exposure                    | 2145<br>(46.2)  | Participants from<br>TLSA                                         | 53+   | 8.00  | Questions on<br>frequency,<br>duration, and<br>intensity of PA    | Frequency | CES-D-10 ≥ 10                                       | Screening<br>level    |
| Uebelacker et al, (2013)           | USA         | 1/1 | Baseline                                | 91912           | Participants from                                                 | 50-79 | 3.00  | Four questions on                                                 | MET.hours | CES-D-6 ≥ 5                                         | Screening             |

|                           |             |       | exposure                                    | (100)       | WHI-OS                                                                      |       |       | exercise frequency, duration, type, and program duration |                     |                                    | level              |
|---------------------------|-------------|-------|---------------------------------------------|-------------|-----------------------------------------------------------------------------|-------|-------|----------------------------------------------------------|---------------------|------------------------------------|--------------------|
| Uemura et al, (2017)      | Japan       | 2/2   | Change in outcome                           | 3106 (48.0) | Participants from Obu Study of Health Promotion for the Elderly             | 71.5  | 12.25 | Questions on engagement in PA of different intensities   | Frequency           | GDS-15 ≥ 6                         | Screening level    |
| Van Gool et al, (2003)    | Netherlands | 1/0   | Change in exposure and outcome              | 1104 (54.6) | Participants from LASA                                                      | 69.9  | 6.00  | LASA PA questionnaire                                    | Time                | CES-D ≥ 16                         | Screening level    |
| van Uffelen et al, (2013) | Australia   | 0/1   | Change in outcome                           | 8950 (100)  | Participants from ALSWH                                                     | 50-55 | 9.00  | Questions on PA frequency and duration                   | METminutes          | CES-D-10 ≥ 10                      | Screening level    |
| Veronese et al, (2017)    | UK          | 1/1   | Baseline exposure<br>Change in outcome      | 4077 (52.5) | Participants from ELSA                                                      | 70.8  | 2.00  | Questions on frequency of moderate and vigorous PA       | Frequency           | CES-D ≥ 16                         | Screening level    |
| Visser et al, (2018)      | Netherlands | 0/1   | Change in exposure and outcome              | 3107 (55.0) | Participants from LASA                                                      | 70.0  | 3.00  | LASA PA questionnaire                                    | Volume              | CES-D (continuous)                 | Symptoms           |
| Wang et al, (2011)        | Taiwan      | 0/1   | Baseline exposure                           | 197 (46.2)  | Community-dwelling older Taiwanese adults                                   | 72.5  | 2.00  | Questions on exercise frequency, duration, and type.     | Volume              | GDS (continuous)                   | Symptoms           |
| Watts et al, (2018)       | USA         | 0/1   | Change in exposure and outcome              | 594 (59.4)  | Participants from the Midwestern Alzheimer’s Disease Center Clinical Cohort | 72.7  | 2.00  | Rapid Assessment of Physical Activity                    | Per 1-unit increase | GDS-15 (continuous)                | Symptoms           |
| Weyerer, (1992)           | Germany     | 0/2   | Baseline exposure                           | 1528 (55.2) | Random sample from three Upper Bavarian communities                         | 47.5  | 5.00  | One question on exercise frequency                       | Frequency           | Clinical interview – ICD diagnosis | Clinical diagnosis |
| Wise et al, (2006)        | USA         | 12/12 | Baseline exposure                           | 35224 (100) | Participants from Black Women’s Health Study                                | 21-69 | 2.00  | One question on exercise duration                        | Volume              | CES-D ≥ 16                         | Screening level    |
| Xie et al, (2019)         | China       | 1/1   | Change in outcome                           | 292 (57.0)  | Freshmen at Anhui Medical University                                        | 19.3  | 0.50  | Single question on PA frequency                          | Frequency           | CES-D (continuous)                 | Symptoms           |
| Yang et al, (2014)        | Finland     | 0/10  | Change in outcome<br>Change in exposure and | 1955 (57.5) | Participants from Young Finns Study                                         | 31.7  | 6.00  | Questions on PA frequency, intensity, and duration       | Volume              | Modified BDI (continuous)          | Symptoms           |

|                        |         |     | outcome            |            |                                           |       |      |                                 |           |                         |                    |
|------------------------|---------|-----|--------------------|------------|-------------------------------------------|-------|------|---------------------------------|-----------|-------------------------|--------------------|
| Yoshida et al., (2015) | Japan   | 2/2 | Change in exposure | 680 (57.2) | Elderly Japanese                          | 72.7  | 3.00 | Question on PA frequency        | Frequency | GDS-15 ≥ 6              | Screening level    |
| Zhang et al, (2018)    | Germany | 2/2 | Baseline exposure  | 1196 (100) | Participants from Dresden Predictor Study | 18-25 | 1.42 | Single question on PA frequency | Frequency | DSM-IV Major Depression | Clinical diagnosis |

**Abbreviations:** ActiFE=Activity and Function in the Elderly in Ulm; ALSWH=Australian Longitudinal Study on Women’s Health; BDI=Beck Depression Inventory; C-SURF=Cohort Study On Substance Use Risk Factors; CARDIA=Coronary Artery Risk Development in Young Adults Study; CePA WHS=Central Pennsylvania Women’s Health Study; CES-D=Centre for Epidemiological Studies Depression scale; CIDI=Composite International Diagnostic Interview; CWHs=California Work and Health Survey; DSM=Statistical Manual of Mental Disorders; ELSA=English Longitudinal Study of Ageing; FINE=Finland, Italy, and the Netherlands Elderly; GDS=Geriatric Depression Scale-short form; GHQ=General Health Questionnaire; GLTEQ=Godin Leisure Time Exercise Questionnaire; HADS-D=Hospital Anxiety and Depression Scale-Depression subscale; HUNT=Nord-Trondelag Health Survey; IDS=Inventory of Depressive Symptoms; IPAQ=International Physical Activity Questionnaire; JAGES=Japan Gerontological Evaluation Study; KLoSA=Korean Longitudinal Study of Aging; KLOSCAD=Korean Longitudinal Study on Cognitive Aging and Dementia; LASA=Longitudinal Aging Study Amsterdam; MADRS=Montgomery–Asberg Depression Rating Scale; MDI=Major Depression Inventory; MET=Metabolic Equivalent; MINI-K=Korean Mini-International Neuropsychiatric Interview; MOSFWBP-C=Medical Outcomes Study Functioning and Well-being Profile Core Subset; NEMESIS=Netherlands Mental Health Survey and Incidence Study; NESDA=Netherlands Study of Depression and Anxiety; NHANES=National Health and Nutrition Examination Survey; NILSLSA=National Institute for Longevity Sciences Longitudinal Study of Aging; NLSAA=Nottingham Longitudinal Study of Activity and Ageing; NR=Not reported; NYC NAMES=The New York City Neighborhood and Mental Health in the Elderly Study II; PA=Physical Activity; PASE=Physical Activity Scale for the Elderly; PHQ=Patient Health Questionnaire; PPMI=Parkinson's Progression Markers Initiative; PPSW=Prospective Population Study of Women; SAD=Symptoms of Anxiety and Depression; SAGE=Study on Global AGEing and Adult Health; SHARE=Survey of Health, Aging and Retirement in Europe; SHIP=Study of Health in Pomerania; SHLSE=Survey of Health and Living Status of the Elderly; SMASH=Study on Musculoskeletal disorders, Absenteeism, Stress, and Health; SR=Self Report; SUN=Seguimiento Universidad de Navarra; SWAN=Study of Women’s Health Across the Nation; TILDA=The Irish Longitudinal Study on Aging; TLISA=Taiwan Longitudinal Study on Aging; WHI-OS=Women's Health Initiative Observational Study; YEDD=Yeoncheon Elderly Depression and Dementia; ZSDS=Zung Self-rating Depression Scale
