# Supplementary material for: Customary physical activity and odds of depression: a systematic review and meta-analysis of 111 prospective cohort studies
Source: HighWire-hosted journal article supplement (doi:10.1136/bjsports-2020-103140), 2021-01-05
Supplement: bjsports-2020-103140supp005_data_supplement.pdf [file bjsports-2020-103140supp005_data_supplement.pdf]

**Supplementary Table 4.** Reports from the Same Cohorts

| Cohort      | Study                    | Crude/<br>adjusted<br>ORs | Study Design                                        | Sample Size<br>(% female) | Follow-up<br>(years) | Exposure         | Study differences by relevant modifiers                                                                                                                                       | Decision                |
|-------------|--------------------------|---------------------------|-----------------------------------------------------|---------------------------|----------------------|------------------|-------------------------------------------------------------------------------------------------------------------------------------------------------------------------------|-------------------------|
| HUNT        | Augestad et al (2008)    | 0/6                       | Baseline exposure                                   | 6661 (50.3)               | 11.00                | 3 doses          | Studies differ based on design, follow-ups, and exposure. Augestad et al (2008) additionally stratified by sex.                                                               | Keep all                |
|             | Ernstsen et al (2016)    | 0/2                       | Change in exposure                                  | 189 (24.3)                | 22.00                | Change           |                                                                                                                                                                               |                         |
|             | Harvey et al (2017)      | 0/1                       | Baseline exposure                                   | 33908 (49.5)              | 11.00                | Binary           |                                                                                                                                                                               |                         |
| ELSA        | Hamer et al (2009)       | 0/2                       | Change in outcome                                   | 4323 (52.5)               | 4.00                 | 2 doses          | Studies differ based on design, waves used, follow-up, and exposure. Veronese et al (2017) the only study with a crude effect.                                                | Drop Frank et al (2018) |
|             | Ohrnberger et al (2017)  | 0/1                       | Change in outcome                                   | 10693 (55.0)              | 2.00                 | Continuous       |                                                                                                                                                                               |                         |
|             | Poole & Jackowska (2018) | 0/1                       | Change in exposure                                  | 5172 (54.6)               | 4.00                 | Continuous       |                                                                                                                                                                               |                         |
|             | Veronese et al (2017)    | 1/1                       | Baseline exposure<br>Change in outcome              | 4077 (52.5)               | 2.00                 | Binary           |                                                                                                                                                                               |                         |
| LASA        | Frank et al (2018)       | 0/1                       | Baseline exposure<br>Change in exposure and outcome | 3809 (51.6)               | 2.00                 | Binary           | Studies included separately in crude and adjusted analyses.                                                                                                                   | Keep all                |
|             | Visser et al (2018)      | 0/1                       | Change in exposure and outcome                      | 3107 (55.0)               | 3.00                 | Binary           |                                                                                                                                                                               |                         |
|             | Van Gool et al (2003)    | 1/0                       | Change in exposure and outcome                      | 1104 (54.6)               | 6.00                 | Change           |                                                                                                                                                                               |                         |
| NHANES      | Brown et al (1996)       | 1/0                       | Baseline exposure                                   | 1322 (55.0)               | 8.00                 | Binary           | Studies included separately in crude and adjusted analyses.                                                                                                                   | Keep all                |
|             | Farmer et al (1988)      | 0/2                       | Baseline exposure                                   | 1163 (51.5)               | 9.00                 | Binary           |                                                                                                                                                                               |                         |
| ALSWH       | Ball et al (2009)        | 4/4                       | Baseline exposure<br>Change in outcome              | 6677 (100)                | 3.00                 | 4 doses          | Ball et al (2009) includes young ALSWH cohort Brown et al (2005), Mahrshahi et al (2014), and van Uffelen et al (2013) differ based on study design, follow-up, and exposure. | Keep all                |
|             | Brown et al (2005)       | 0/2                       | Change in exposure and outcome                      | 8855 (100)                | 4.00                 | 2 doses & change |                                                                                                                                                                               |                         |
|             | Mahrshahi et al (2014)   | 3/3                       | Baseline exposure                                   | 5117 (100)                | 3.00                 | 3 doses          |                                                                                                                                                                               |                         |
|             | van Uffelen et al (2013) | 0/1                       | Change in outcome                                   | 8950 (100)                | 9.00                 | Binary           |                                                                                                                                                                               |                         |
| Young Finns | Yang et al (2014)        | 0/10                      | Change in outcome                                   | 1955 (57.5)               | 6.00                 | 3 doses & change | Studies differ based on designs and exposures.                                                                                                                                | Keep both               |

|                            |                                |     |                                                                  |              |       |                    |                                                                                                                                                           |                            |
|----------------------------|--------------------------------|-----|------------------------------------------------------------------|--------------|-------|--------------------|-----------------------------------------------------------------------------------------------------------------------------------------------------------|----------------------------|
|                            | Kaseva et al (2016)            | 0/1 | Change in exposure and outcome<br>Baseline exposure              | 1724 (50.9)  | 5.00  | Continuous         |                                                                                                                                                           |                            |
| SHARE                      | Khalaila & Litwin, (2014)      | 0/2 | Change in exposure and outcome<br>Baseline exposure              | 1524 (57.0)  | 4.00  | Change             | Khalaila & Litwin (2014) and Khalaila (2016) differ based on design, waves used, and follow-up period. Lindwall et al (2011) includes total SHARE sample. | Keep all                   |
|                            | Khalaila, (2016)               | 1/1 | Baseline exposure                                                | 1038 (58.2)  | 10.00 | Binary             |                                                                                                                                                           |                            |
|                            | Lindwall et al (2011)          | 1/0 | Baseline exposure                                                | 17593 (54.6) | 2.00  | Continuous         |                                                                                                                                                           |                            |
| Alameda County Study       | Camacho et al (1991)           | 0/2 | Change in exposure and outcome<br>Change in exposure and outcome | 4848 (55.6)  | 9.00  | Binary and change  | Studies differ based on design, waves used, and follow-up period. Only Strawbridge et al (2002) has crude effects.                                        | Keep both                  |
|                            | Strawbridge et al (2002)       | 2/1 | Baseline exposure                                                | 1947 (56.0)  | 5.00  | 2 doses            |                                                                                                                                                           |                            |
| TLSA                       | Chang et al (2017)             | 0/4 | Change in outcome<br>Baseline exposure                           | 2673 (45.5)  | 8.00  | 4 doses            | Studies differ based on design, waves used, and follow-up.                                                                                                | Keep all                   |
|                            | Chi et al (2016)               | 0/2 | Baseline exposure                                                | 2630 (46.8)  | 4.00  | 2 doses            |                                                                                                                                                           |                            |
|                            | Tsai et al (2013)              | 0/2 | Baseline exposure                                                | 2145 (46.2)  | 8.00  | 2 doses            |                                                                                                                                                           |                            |
| Precursors Study           | Cooper-Patrick et al (1997)    | 2/2 | Baseline exposure<br>Change in exposure and outcome              | 752 (8.0)    | 15.00 | 2 doses            | Studies differ based on design, waves used, and follow-up period. Only Cooper-Patrick et al (1997) has adjusted effects.                                  | Keep both                  |
|                            | Ford et al (1998)              | 1/0 | Change in exposure and outcome                                   | 1190 (0)     | 37.00 | Binary             |                                                                                                                                                           |                            |
| Health Worker Cohort Study | Gallegos-Carrillo et al (2013) | 2/2 | Change in exposure<br>Change in outcome                          | 1047 (77.5)  | 6.00  | 2 doses & change   | Different cohorts.                                                                                                                                        | Keep both                  |
|                            | Quezada et al (2017)           | 0/1 | Change in outcome                                                | 456 (100)    | 5.00  | Continuous         |                                                                                                                                                           |                            |
| SUN                        | Ruiz-Estigarribia et al (2019) | 0/1 | Baseline exposure                                                | 14908 (59.5) | 18.00 | Binary             | Studies differ based on follow-up.                                                                                                                        | Keep both                  |
|                            | Sanchez-Villegas et al (2008)  | 0/1 | Baseline exposure                                                | 10381 (54.0) | 6.00  | Binary             |                                                                                                                                                           |                            |
| TILDA                      | McDowell et al (2018)          | 3/3 | Baseline exposure                                                | 4146 (44.6)  | 2.00  | Binary and 2 doses | Substantial overlap – McDowell et al's primary focus is PA. Carvalho et al's focus is grip strength (PA included as covariate).                           | Drop Carvalho et al (2019) |
|                            | Carvalho et al (2019)          | 0/2 | Baseline exposure                                                | 5010 (51.1)  | 2.00  | 2 doses            |                                                                                                                                                           |                            |
