# Supplementary material for: Customary physical activity and odds of depression: a systematic review and meta-analysis of 111 prospective cohort studies
Source: HighWire-hosted journal article supplement (doi:10.1136/bjsports-2020-103140), 2021-01-05
Supplement: bjsports-2020-103140supp008_data_supplement.pdf [file bjsports-2020-103140supp008_data_supplement.pdf]

**Supplementary References. References of All Studies Included in the Meta-Analysis**

- s1. Adjibade M, Lemogne C, Julia C, et al. Prospective association between combined healthy lifestyles and risk of depressive symptoms in the French NutriNet-Santé cohort. *J Affect Disord.* 2018; 238:554-562.
- s2. Amara AW, Chahine L, Seedorff N, Caspell-Garcia CJ, Coffey C, Simuni T. Parkinson's Progression Markers Initiative. Self-reported physical activity levels and clinical progression in early Parkinson's disease. *Parkinsonism Relat D.* 2019;61:118-25.
- s3. Anagnostopoulos A, Ledergerber B, Jaccard R, et al. Frequency of and Risk Factors for Depression among Participants in the Swiss HIV Cohort Study (SHCS). *Plos One.* 2015;10(10): e0140943.
- s4. Andrade-Gómez E, Martínez-Gómez D, Rodríguez-Artalejo F, García-Esquinas E. Sedentary behaviors, physical activity, and changes in depression and psychological distress symptoms in older adults. *Depress. Anxiety.* 2018;35(9):884-97.
- s5. Augestad LB, Slettemoen RP, Flanders WD. Physical Activity and Depressive Symptoms Among Norwegian Adults Aged 20-50. *Public Health Nurs* 2008;25(6):536-545.
- s6. Bäckmand HM, Kaprio J, Kujala UM, Sarna S. Physical activity, mood and the functioning of daily living A longitudinal study among former elite athletes and referents in middle and old age. *Arch Gerontol Geriatr* 2009;48(1):1-9.
- s7. Ball K, Burton NW, Brown WJ. A prospective study of overweight, physical activity, and depressive symptoms in young women. *Obesity.* 2009;17(1):66-71.
- s8. Baumeister SE, Leitzmann MF, Bahls M, et al. Associations of Leisure-Time and Occupational Physical Activity and Cardiorespiratory Fitness With Incident and Recurrent Major Depressive Disorder, Depressive Symptoms, and Incident Anxiety in a General Population. *J Clin Psychiatry* 2017;78(1):e41-e47.
- s9. Beard JR, Heathcote K, Brooks R, Earnest A, Kelly B. Predictors of mental disorders and their outcome in a community based cohort. *Soc Psychiatry Psychiatr Epidemiol* 2007;42(8):623-630.
- s10. Bernaards C, Jans M, Van den Heuvel S, Hendriksen I, Houtman I, Bongers P. Can strenuous leisure time physical activity prevent psychological complaints in a working population? *Occup Environ Med* 2006;63(1):10-16.
- s11. Bots S, Tijhuis M, Giampaoli S, Kromhout D, Nissinen A. Lifestyle- and diet-related factors in late-life depression—a 5-year follow-up of elderly European men: the FINE study. *Int J Geriatr Psychiatry.* 2007;23(5):478-484.
- s12. Boyes AW, Girgis A, D'Este CA, Zucca AC, Lecathelinais C. Prevalence and predictors of the short-term trajectory of anxiety and depression in the first year after a cancer diagnosis: a population-based longitudinal study. *J Clin Oncol.* 2013;31(21):2724-2729..
- s13. Bränström R, Petersson L-M, Saboonchi F, Wennman-Larsen A, Alexanderson K. Physical activity following a breast cancer diagnosis: Implications for self-rated health and cancer-related symptoms. *Eur J Oncol Nurs.* 2015;19(6):680-685.
- s14. Brown DR, Croft JB, Anda RF, Barrett DH, Escobedo LG. Evaluation of smoking on the physical activity and depressive symptoms relationship. *Med Sci Sports Exerc.* 1996;28(2):233-240.

- s15. Brown WJ, Ford JH, Burton NW, Marshall AL, Dobson AJ. Prospective study of physical activity and depressive symptoms in middle-aged women. *Am J Prev Med.* 2005;29(4):265-272.
- s16. Brunet J, O'Loughlin JL, Gunnell KE, Sabiston CM. Physical activity and depressive symptoms after breast cancer: Cross-sectional and longitudinal relationships. *Health Psychol.* 2018;37(1):14.
- s17. Byers AL, Vittinghoff E, Lui L-Y, et al. Twenty-year depressive trajectories among older women. *Arch Gen Psychiatry.* 2012;69(10):1073-1079.
- s18. Cabello M, Miret M, Caballero FF, et al. The role of unhealthy lifestyles in the incidence and persistence of depression: a longitudinal general population study in four emerging countries. *Global Health* 2017;13(1):18.
- s19. Camacho TC, Roberts RE, Lazarus NB, Kaplan GA, Cohen RD. Physical activity and depression: evidence from the Alameda County Study. *Am J Epidemiol.* 1991;134(2):220-231.
- s20. Capella McDonnall M. Physical status as a moderator of depressive symptoms among older adults with dual sensory loss. *Rehabil Psychol.* 2011;56(1):67-76.
- s21. Carroll DD, Blanck HM, Serdula MK, Brown DR. Obesity, physical activity, and depressive symptoms in a cohort of adults aged 51 to 61. *J Aging Health.* 2010; 22(3):384-398.
- s22. Chang M, Snaedal J, Einarsson B, et al. The Association Between Midlife Physical Activity and Depressive Symptoms in Late Life: Age Gene/Environment Susceptibility—Reykjavik Study. *J Gerontol A Biol Sci Med Sci.* 2015;71(4):502-507.
- s23. Chang YC, Lu MC, Hu IH, Wu WC, Hu SC. Effects of different amounts of exercise on preventing depressive symptoms in community-dwelling older adults: a prospective cohort study in Taiwan. *BMJ open.* 2017;7(4):e014256.
- s24. Chao SF. Changes in Leisure Activities and Dimensions of Depressive Symptoms in Later Life: A 12-Year Follow-Up. *Gerontologist.* 2014;56(3):397-407.
- s25. Chen J, Millar WJ. Health effects of physical activity. *Health Reports-statistics Canada.* 1999;11:21-30.
- s26. Chi SH, Wang JY, Tsai AC. Combined association of leisure-time physical activity and fruit and vegetable consumption with depressive symptoms in older Taiwanese: Results of a national cohort study. *Geriatr Gerontol Int.* 2016;16(2):244-251.
- s27. Choi Y, Park EC, Kim JH, Yoo KB, Choi JW, Lee KS. A change in social activity and depression among Koreans aged 45 years and more: analysis of the Korean Longitudinal Study of Aging (2006-2010). *Int Psychogeriatr.* 2015;27(4):629.
- s28. Choi KW, Zheutlin AB, Karlson RA, et al. Physical activity offsets genetic risk for incident depression assessed via electronic health records in a biobank cohort study. *Depress. Anxiety.* 2020;37(2):106-14.
- s29. Chuang CH, Cattoi AL, McCall-Hosenfeld JS, Camacho F, Dyer AM, Weisman CS. Longitudinal association of intimate partner violence and depressive symptoms. *Ment Health Fam Med.* 2012;9(2):107-114.
- s30. Cooper-Patrick L, Ford DE, Mead LA, Chang PP, Klag MJ. Exercise and depression in midlife: a prospective study. *Am J Public Health.* 1997;87(4):670-673.

- s31. Da Silva MA, Singh-Manoux A, Brunner EJ, et al. Bidirectional association between physical activity and symptoms of anxiety and depression: the Whitehall II study. *Eur J Epidemiol* 2012;27(7):537-546.
- s32. Dugan SA, Bromberger JT, Segawa E, Avery E, Sternfeld B. Association between physical activity and depressive symptoms: midlife women in SWAN. *Med Sci Sports Exerc*. 2015;47(2):335-342.
- s33. Edwards KA, Molton IR, Smith AE, et al. Relative Importance of Baseline Pain, Fatigue, Sleep, and Physical Activity: Predicting Change in Depression in Adults With Multiple Sclerosis. *Arch Phys Med Rehabil*. 2016;97(8):1309-1315.
- s34. Ensari I, Motl RW, McAuley E, Mullen SP, Feinstein A. Patterns and predictors of naturally occurring change in depressive symptoms over a 30-month period in multiple sclerosis. *Mult Scler J*. 2014;20(5):602-609.
- s35. Ernstsén L, Rangul V, Nauman J, et al. Protective Effect of Regular Physical Activity on Depression After Myocardial Infarction: The HUNT Study. *Am J Med*. 2016;129(1):82-88.
- s36. España-Romero V, Artero EG, Lee D-c, et al. A prospective study of ideal cardiovascular health and depressive symptoms. *Psychosomatics*. 2013;54(6):525-535.
- s37. Farmer ME, Locke BZ, Mościcki EK, Dannenberg AL, Larson DB, Radloff LS. Physical activity and depressive symptoms: the NHANES I Epidemiologic Follow-up Study. *Am J Epidemiol*. 1988;128(6):1340-1351.
- s38. Ford DE, Mead LA, Chang PP, Cooper-Patrick L, Wang N-Y, Klag MJ. Depression is a risk factor for coronary artery disease in men: the precursors study. *Arch Intern Med*. 1998;158(13):1422-1426.
- s39. Foreyt J, Brunner R, Goodrick G, St SJ, Miller G. Psychological correlates of reported physical activity in normal-weight and obese adults: The Reno diet-heart study. *Int J Obes* 1995;19:S69-72.
- s40. Fukukawa Y, Nakashima C, Tsuboi S, et al. Age differences in the effect of physical activity on depressive symptoms. *Psychol aging*. 2004;19(2):346.
- s41. Gallegos-Carrillo K, Flores YN, Denova-Gutiérrez E, et al. Physical activity and reduced risk of depression: Results of a longitudinal study of Mexican adults. *Health Psychol*. 2013;32(6):609.
- s42. García-Peña C, Wagner FA, Sánchez-García S, et al. Late-life depressive symptoms: Prediction models of change. *J Affect Disord*. 2013;150(3):886-894.
- s43. Giltay EJ, Zitman FG, Kromhout D. Dispositional optimism and the risk of depressive symptoms during 15 years of follow-up: the Zutphen Elderly Study. *J Affect Disord*. 2006;91(1):45-52.
- s44. Gudmundsson P, Lindwall M, Gustafson D, et al. Longitudinal associations between physical activity and depression scores in Swedish women followed 32 years. *Acta Psychiatr Scand*. 2015;132(6):451-458.
- s45. Hallgren M, Lundin A, Vancampfort D, Stubbs B, Schuch F, Bellocco R, Lagerros YT. Prospective associations between physical activity and clinician diagnosed major depressive disorder in adults: a 13-year cohort study. *Prev. Med*. 2019;118:38-43.
- s46. Hamer M, Molloy GJ, de Oliveira C, Demakakos P. Leisure time physical activity, risk of depressive symptoms, and inflammatory mediators: The English Longitudinal Study of Ageing. *Psychoneuroendocrinology*. 2009;34(7):1050-1055.

- s47. Han KM, Kim MS, Kim A, Paik JW, Lee J, Ham BJ. Chronic medical conditions and metabolic syndrome as risk factors for incidence of major depressive disorder: A longitudinal study based on 4.7 million adults in South Korea. *J Affect Disord.* 2019;257:486-94.
- s48. Harvey SB, Øverland S, Hatch SL, Wessely S, Mykletun A, Hotopf M. Exercise and the prevention of depression: results of the HUNT Cohort Study. *Am J Psychiatry.* 2017;175(1):28-36.
- s49. Henchoz Y, Baggio S, N’Goran AA, et al. Health impact of sport and exercise in emerging adult men: A prospective study. *Qual Life Res* 2014;23(8):2225-2234.
- s50. Herbolsheimer F, Ungar N, Peter R. Why is social isolation among older adults associated with depressive symptoms? The mediating role of out-of-home physical activity. *Int. J. Behav. Med.* 2018;25(6):649-57.
- s51. Hiles SA, Baker AL, de Malmanche T, McEvoy M, Boyle M, Attia J. Unhealthy lifestyle may increase later depression via inflammation in older women but not men. *J Psychiatr Res* 2015;63:65-74.
- s52. Hiles S, Lamers F, Milaneschi Y, Penninx B. Sit, step, sweat: longitudinal associations between physical activity patterns, anxiety and depression. *Psychol Med* 2017;47(8):1466-1477.
- s53. Hurwitz EL. Do asthma and physical inactivity influence the associations of personal and job stressors with perceived stress and depression? Findings from the 1998–1999 California Work and Health Survey. *Ann Epidemiol.* 2003;13(5):358-368.
- s54. Ivanova E, Burns RJ, Deschênes SS, Knäuper B, Schmitz N. A Longitudinal Investigation of Anxiety and Depressive Symptomatology and Exercise Behaviour Among Adults With Type 2 Diabetes Mellitus. *Can J Diabetes.* 2016;41(1):73-81.
- s55. Jantunen H, Wasenius N, Salonen MK, et al. Change in physical activity and health-related quality of life in old age—A 10-year follow-up study. *Scand J Med Sci Sports.* 2019;29(11):1797-804.
- s56. Joshi S, Mooney SJ, Kennedy GJ, et al. Beyond METs: types of physical activity and depression among older adults. *Age Ageing.* 2016;45(1):103-109.
- s57. Kanamori S, Takamiya T, Inoue S, Kai Y, Tsuji T, Kondo K. Frequency and pattern of exercise and depression after two years in older Japanese adults: the JAGES longitudinal study. *Scientific reports.* 2018;8(1):11224.
- s58. Kaseva K, Rosenström T, Hintsa T, et al. Trajectories of Physical Activity Predict the Onset of Depressive Symptoms but Not Their Progression: A Prospective Cohort Study. *J Sports Med.* 2016;8947375.
- s59. Khalaila R, Litwin H. Changes in health behaviors and their associations with depressive symptoms among Israelis aged 50+. *J Aging Health.* 2014;26(3):401-421.
- s60. Khalaila R. Depression statuses and related predictors in later life: A 10-year follow-up study in Israel. *Eur J Ageing.* 2016;13(4):311-321.
- s61. Knox S, Barnes A, Kiefe C, et al. History of depression, race, and cardiovascular risk in CARDIA. *Int J Behav Med.* 2006;13(1):44-50.
- s62. Kritz-Silverstein D, Barrett-Connor E, Corbeau C. Cross-sectional and prospective study of exercise and depressed mood in the elderly: the Rancho Bernardo study. *Am J Epidemiol.* 2001;153(6):596-603.

- s63. Ku PW, Fox KR, Chen LJ. Physical activity and depressive symptoms in Taiwanese older adults: A seven-year follow-up study. *Prev Med.* 2009;48(3):250-255.
- s64. Ku PW, Fox KR, Chen LJ, Chou P. Physical activity and depressive symptoms in older adults: 11-year follow-up. *Am J Prev Med.* 2012;42(4):355-362.
- s65. Lampinen P, Heikkinen R-L, Ruoppila I. Changes in intensity of physical exercise as predictors of depressive symptoms among older adults: an eight-year follow-up. *Prev Med.* 2000;30(5):371-380.
- s66. Lee DCA, Lalor AF, Russell G, et al. Understanding temporal relationships between depression, falls, and physical activity in a cohort of post-hospitalized older adults—a breakthrough or a conundrum? *Int Psychogeriatr.* 2017;29(10):1681-1692.
- s67. Lindwall MT, Larsman P, Hagger MS. The Reciprocal Relationship Between Physical Activity and Depression in Older European Adults: A Prospective Cross-Lagged Panel Design Using SHARE Data. *Health Psychol.* 2011;30(4):453-462.
- s68. Lindwall M, Gerber M, Jonsdottir IH, Börjesson M, Ahlborg Jr G. The relationships of change in physical activity with change in depression, anxiety, and burnout: A longitudinal study of Swedish healthcare workers. *Health Psychol.* 2014;33(11):1309.
- s69. Lucas M, Mekary R, Pan A, et al. Relation between clinical depression risk and physical activity and time spent watching television in older women: a 10-year prospective follow-up study. *Am J Epidemiol.* 2011;174(9):1017-1027.
- s70. McDowell C, Dishman R, Hallgren M, MacDonncha C, Herring M. Associations of physical activity and depression: Results from the Irish Longitudinal Study on Ageing. *Exp Gerontol.* 2018;112:68-75.
- s71. Messier L, Elisha B, Schmitz N, et al. Changes in depressive symptoms and changes in lifestyle-related indicators: A 1-year follow-up study among adults with type 2 diabetes in Quebec. *Can J Diabetes.* 2013;37(4):243-248.
- s72. Mihrshahi S, Dobson A, Mishra G. Fruit and vegetable consumption and prevalence and incidence of depressive symptoms in mid-age women: results from the Australian longitudinal study on women's health. *Eur J Clin Nutr* 2015;69(5):585.
- s73. Mobily KE, Rubenstein LM, Lemke JH, O'Hara MW, Wallace RB. Walking and depression in a cohort of older adults: The Iowa 65+ Rural Health Study. *J Aging Phys Act.* 1996;4(2):119-135.
- s74. Monin JK, Levy B, Chen B, et al. Husbands' and Wives' Physical Activity and Depressive Symptoms: Longitudinal Findings from the Cardiovascular Health Study. *Ann Behav Med.* 2015;49(5):704-714.
- s75. Morgan K, Bath PA. Customary physical activity and psychological wellbeing: a longitudinal study. *Age Ageing.* 1998;27(3):35-40.
- s76. Motl RW, Suh Y, Weikert M, Dlugonski D, Balantrapu S, Sandroff B. Fatigue, depression, and physical activity in relapsing-remitting multiple sclerosis: Results from a prospective, 18-month study. *Mult Scler Relat Disord.* 2012;1(1):43-48.
- s77. Oh DJ, Han JW, Kim TH, et al. Epidemiological characteristics of subsyndromal depression in late life. *Aust. N. Z. J. Psychiatry.* 2020;54(2):150-8.
- s78. Ohrnberger J, Fichera E, Sutton M. The relationship between physical and mental health: A mediation analysis. *Soc Sci Med.* 2017;195:42-49.

- s79. Paffenbarger Jr R, Lee IM, Leung R. Physical activity and personal characteristics associated with depression and suicide in American college men. *Acta Psychiatr Scand*. 1994;89:16-22.
- s80. Park JE, Lee JY, Kim BS, Kim KW, Chae SH, Cho MJ. Above-moderate physical activity reduces both incident and persistent late-life depression in rural Koreans. *Int J Geriatr Psychiatry*. 2015;30(7):766-775.
- s81. Perrino T, Mason CA, Brown SC, Szapocznik J. The relationship between depressive symptoms and walking among Hispanic older adults: A longitudinal, cross-lagged panel analysis. *Aging Ment Health*. 2010;14(2):211-219.
- s82. Pinto Pereira SM, Geoffroy MC, Power C. Depressive symptoms and physical activity during 3 decades in adult life: bidirectional associations in a prospective cohort study. *JAMA psychiatry*. 2014;71(12):1373-1380.
- s83. Poole L, Jackowska M. The Epidemiology of Depressive Symptoms and Poor Sleep: Findings from the English Longitudinal Study of Ageing (ELSA). *Int J Behav Med*. 2018;25(2):151-161.
- s84. Quezada AD, Macías-Waldman N, Salmerón J, Swigart T, Gallegos-Carrillo K. Physical activity and calorie intake mediate the relationship from depression to body fat mass among female Mexican health workers. *Int J Behav Nutr Phys Act*. 2017;14(1):160.
- s85. Raudsepp L, Riso E-M. Longitudinal Association Between Objectively Measured Walking and Depressive Symptoms Among Estonian Older Adults. *J Aging Phys Act*. 2017;25(4):639-645.
- s86. Ribeiro SM, Malmstrom TK, Morley JE, Miller DK. Fruit and vegetable intake, physical activity, and depressive symptoms in the African American Health (AAH) study. *J Affect Disord*. 2017;220:31-37.
- s87. Rius-Ottenheim N, Geleijnse JM, Kromhout D, van der Mast RC, Zitman FG, Giltay EJ. Physical activity after myocardial infarction: is it related to mental health? *Eur J Prev Cardiol*. 2013;20(3):399-408.
- s88. Roh HW, Hong CH, Lee Y, et al. Participation in Physical, Social, and Religious Activity and Risk of Depression in the Elderly: A Community-Based Three-Year Longitudinal Study in Korea. *Plos One*. 2015;10(7).
- s89. Rubin RR, Knowler WC, Ma Y, et al. Depression symptoms and antidepressant medicine use in Diabetes Prevention Program participants. *Diabetes care*. 2005;28(4):830-837.
- s90. Ruiz-Estigarribia L, Martínez-González MÁ, Díaz-Gutiérrez J, Sánchez-Villegas A, Lahortiga-Ramos F, Bes-Rastrollo M. Lifestyles and the risk of depression in the “Seguimiento Universidad de Navarra” cohort. *Eur Psychiatry*. 2019;61:33-40.
- s91. Sanchez-Villegas A, Ara I, Guillén-Grima F, Bes-Rastrollo M, Varo-Cenarruzabeitia JJ, Martínez-González MA. Physical activity, sedentary index, and mental disorders in the SUN cohort study. *Med Sci Sports Exerc*. 2008;40(5):827-834.
- s92. Sin NL, Kumar AD, Gehi AK, Whooley MA. Direction of Association Between Depressive Symptoms and Lifestyle Behaviors in Patients with Coronary Heart Disease: the Heart and Soul Study. *Ann Behav Med*. 2016;50(4):523-532.
- s93. Smith TL, Masaki KH, Fong K, et al. Effect of Walking Distance on 8-Year Incident Depressive Symptoms in Elderly Men with and without Chronic Disease: The Honolulu-Asia Aging Study. *J Am Geriatr Soc*. 2010;58(8):1447-1452.

- s94. Stewart AL, Hays RD, Wells KB, Rogers WH, Spritzer KL, Greenfield S. Long-term functioning and well-being outcomes associated with physical activity and exercise in patients with chronic conditions in the Medical Outcomes Study. *J Clin Epidemiol.* 1994;47(7):719-730.
- s95. Strawbridge WJ, Deleger S, Roberts RE, Kaplan GA. Physical activity reduces the risk of subsequent depression for older adults. *Am J Epidemiol.* 2002;156(4):328-334.
- s96. ten Have M, de Graaf R, Monshouwer K. Physical exercise in adults and mental health status: findings from the Netherlands mental health survey and incidence study (NEMESIS). *J Psychosom Res* 2011;71(5):342-348.
- s97. Tsai AC, Chi SH, Wang JY. Cross-sectional and longitudinal associations of lifestyle factors with depressive symptoms in  $\geq$  53-year old Taiwanese - results of an 8-year cohort study. *Prev Med.* 2013;57(2):92-97.
- s98. Uebelacker LA, Eaton CB, Weisberg R, et al. Social support and physical activity as moderators of life stress in predicting baseline depression and change in depression over time in the Women's Health Initiative. *Soc. Psychiatry Psychiatr. Epidemiol.* 2013;48(12):1971-1982.
- s99. Uemura K, Makizako H, Lee S, et al. Behavioral protective factors of increased depressive symptoms in community-dwelling older adults: A prospective cohort study. *Int J Geriatr Psychiatry.* 2017;33(2):e234-e241.
- s100. Van Gool CH, Kempen GI, Penninx BW, Deeg DJ, Beekman AT, Van Eijk JT. Relationship between changes in depressive symptoms and unhealthy lifestyles in late middle aged and older persons: results from the Longitudinal Aging Study Amsterdam. *Age Ageing.* 2003;32(1):81-87.
- s101. van Uffelen JGZ, van Gellecum YR, Burton NW, Peeters G, Heesch KC, Brown WJ. Sitting-Time, Physical Activity, and Depressive Symptoms in Mid-Aged Women. *Am J Prev Med.* 2013;45(3):276-281.
- s102. Veronese N, Solmi M, Maggi S, et al. Frailty and incident depression in community-dwelling older people: results from the ELSA study. *Int J Geriatr Psychiatry.* 2017;32(12):e141-e149.
- s103. Visser M, Wijnhoven HA, Comijs HC, Thomése FG, Twisk JW, Deeg DJ. A Healthy Lifestyle in Old Age and Prospective Change in Four Domains of Functioning. *J Aging Health.* 2018: <https://doi.org/10.1177/0898264318774430>.
- s104. Wang F, DesMeules M, Luo W, Dai S, Lagace C, Morrison H. Leisure-time physical activity and marital status in relation to depression between men and women: A prospective study. *Health Psychol.* 2011;30(2):204.
- s105. Watts AS, Mortby ME, Burns JM. Depressive symptoms as a barrier to engagement in physical activity in older adults with and without Alzheimer's disease. *Plos One.* 2018;7;13(12):e0208581.
- s106. Weyerer S. Physical inactivity and depression in the community. *Int J Sports Med.* 1992;13(06):492-496.
- s107. Wise LA, Adams-Campbell LL, Palmer JR, Rosenberg L. Leisure time physical activity in relation to depressive symptoms in the Black Women's Health Study. *Ann Behav Med.* 2006;32(1):68-76.

- s108. Xie H, Tao S, Zhang Y, Tao F, Wu X. Impact of problematic mobile phone use and insufficient physical activity on depression symptoms: a college-based follow-up study. *BMC Public Health*. 2019;19(1):1640.
- s109. Yang X, Hirvensalo M, Hintsanen M, et al. Longitudinal associations between changes in physical activity and depressive symptoms in adulthood: The Young Finns study. *Int J Behav Med*. 2014;21(6):908-917.
- s110. Yoshida Y, Iwasa H, Kumagai S, Suzuki T, Awata S, Yoshida H. Longitudinal association between habitual physical activity and depressive symptoms in older people. *Psychiatry Clin Neurosci*. 2015;69(11):686-692.
- s111. Zhang XC, Woud ML, Becker ES, Margraf J. Do health-related factors predict major depression? A longitudinal epidemiologic study. *Clin Psychol Psychother*. 2018;25(3):378-387.
