# Supplementary figures and images for: Customary physical activity and odds of depression: a systematic review and meta-analysis of 111 prospective cohort studies
Source: HighWire-hosted journal article supplement (doi:10.1136/bjsports-2020-103140), 2021-01-05

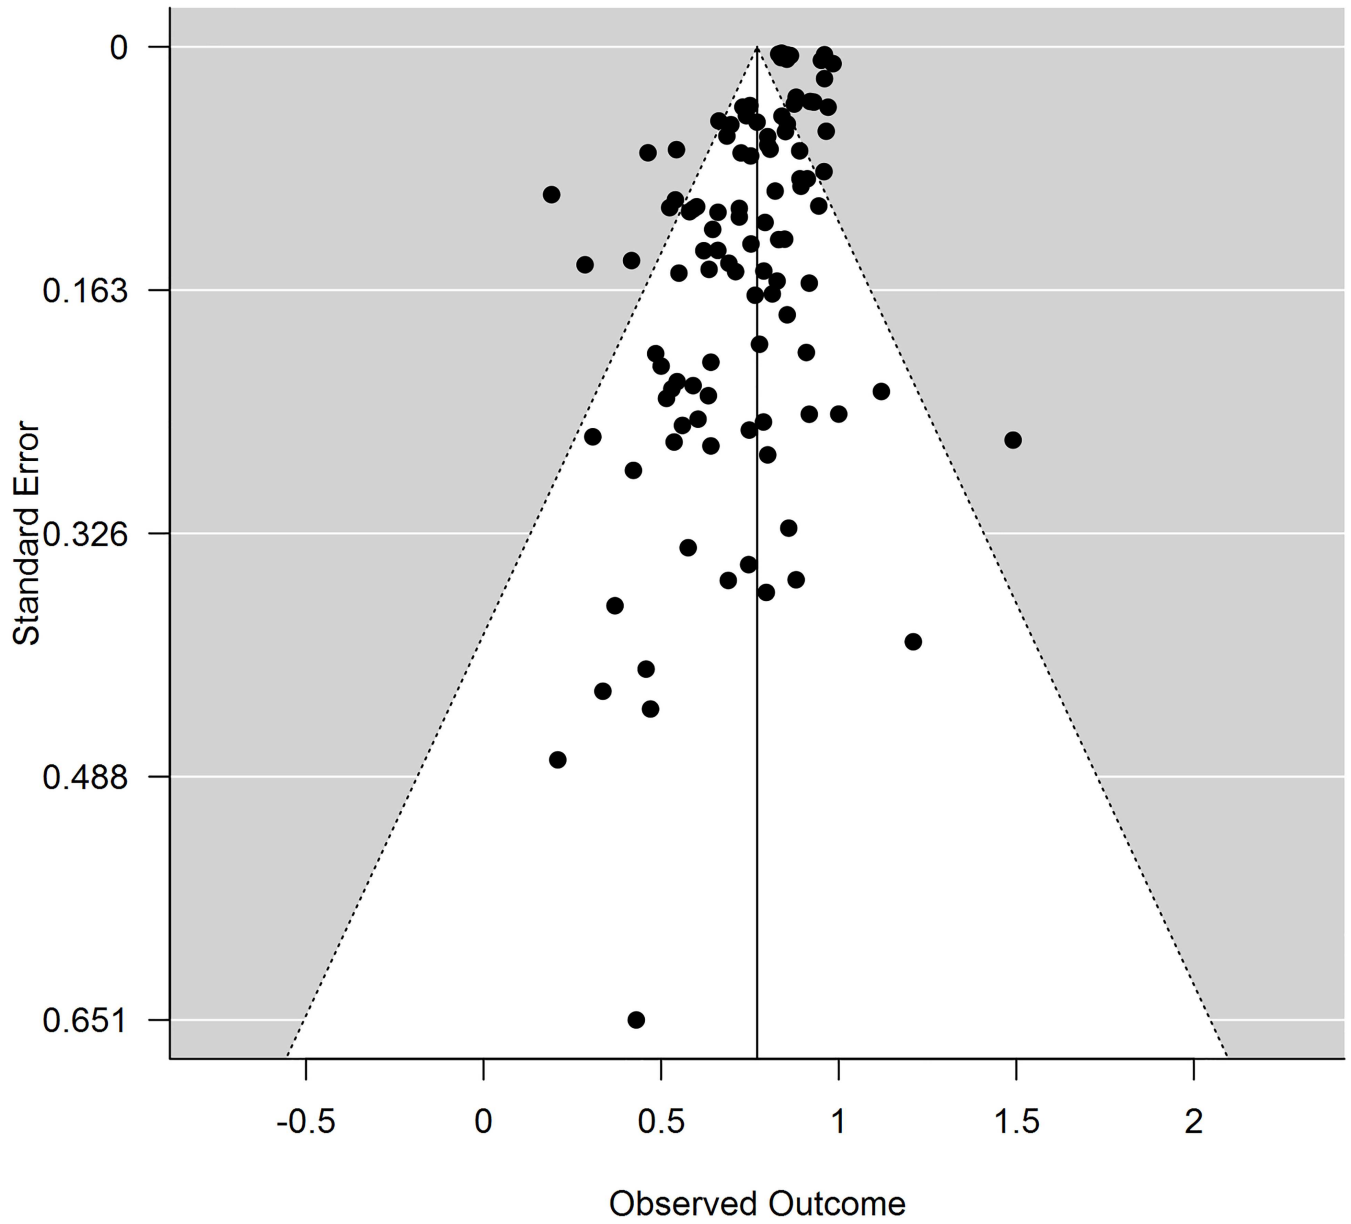

Supplement: bjsports-2020-103140supp006_data_supplement.pdf [file bjsports-2020-103140supp006_data_supplement.pdf]
